# Supplementary material
Source: PubMed Central journal article supplement (PMC4356763)

## Supplemental Information

**Supplementary Table S1. Primers for NA pyrosequencing analysis**

| <b>Primer name</b>                                       | <b>Sequence</b>                                                                                     | <b>Target position(s)</b> |
|----------------------------------------------------------|-----------------------------------------------------------------------------------------------------|---------------------------|
| N2-F333-biot<br>N2-R914<br>N2-R377-seq                   | 5'-biotin-TGGGGACATCTGGGTGACA-3'<br>5'-ATATCTACGATGGGCCTATTGGA-3'<br>5'-GGATCGCATGACACATA-3'        | 119                       |
| N2-F289<br>N2-R503-biot<br>N2-F391-seq                   | 5'-TTTGCACCTTTYTCTAAGGACAAT-3'<br>5'-biotin-TGAAAAGGAACACCCAACTCAT-3'<br>5'-CAATTTGCCCTTGGA-3'      | 136                       |
| N2-F566<br>N2-R868-biot<br>N2-F645-seq                   | 5'-GGCTGCATGTTTGTGTAACG-3'<br>5'-biotin-5CACATCTGACACCAGGATATCG-3'<br>5'-TGTTTCATGGTCCAAAG-3'       | 222                       |
| N2-F333-biot<br>N2-R914<br>N2-292/294-<br>R905-seq       | 5'-biotin-5TGGGGACATCTGGGTGACA-3'<br>5'-ATATCTACGATGGGCCKATTGGA-3'<br>5'-ATGGGCCTATTGGAKCC-3'       | 292 and 294               |
| N2-F516<br>N2-R842-biot<br><br>N2-deletions-<br>F715-seq | 5'-GCAAGTGTGCATAGCATGGTC-3'<br>5'-biotin-ATCTGACACCAGGATATCGAGGAT-<br>3'<br>5'-GTAGTMATGACTGATGG-3' | 245-248 and 247-250       |

**Supplementary Table S2. Primers used for NA RT-PCR and Sanger sequence analysis**

| <b>Primer name</b>      | <b>Sequence</b>                   |
|-------------------------|-----------------------------------|
| N2NA-F2                 | 5'-GCAAAAGCAGGAGTRAARATGAATC-3'   |
| N2NA-F634 <sup>a</sup>  | 5'-CATTTACRATGGGAGGCTTGTAGATAG-3' |
| N2NA-R1110              | 5'-CTTCCCATCCACACGTCATTTCCA-3'    |
| N2NA-R1425 <sup>a</sup> | 5'-ATAGGCATGAGATTGATRCCGC-3'      |
| N2NA-F330 <sup>b</sup>  | 5'-ATTCRATTMGGCTTCCGCTGGTG-3'     |
| N2NA-R651 <sup>b</sup>  | 5'-CTATCTACAAGCCTCCCATYGTAAATG-3' |

<sup>a</sup>Primers used for RT-PCR and Sanger sequencing reactions.

<sup>b</sup>Primers used only for Sanger sequencing reaction.

**Supplementary Figure S1.** Pyrograms of influenza A(H3N2) viruses with and without a 12-nucleotide (4-amino acid) deletion in the neuraminidase. The customized order of the nucleotide dispensation creates a gap (dispensations 14-20) in the pyrogram, unless there is the 12-nucleotide deletion in the neuraminidase gene at this site. A) The wildtype (no deletion) sequence was detected in clone 1 of A/Massachusetts/07/2013; B) The 12-nucleotide deletion (amino acid residues 245 to 258) was detected in clone 2 of A/Massachusetts/07/2013; C) The 4-amino-acid deletion from 247 to 250 was detected in the clinical specimen.

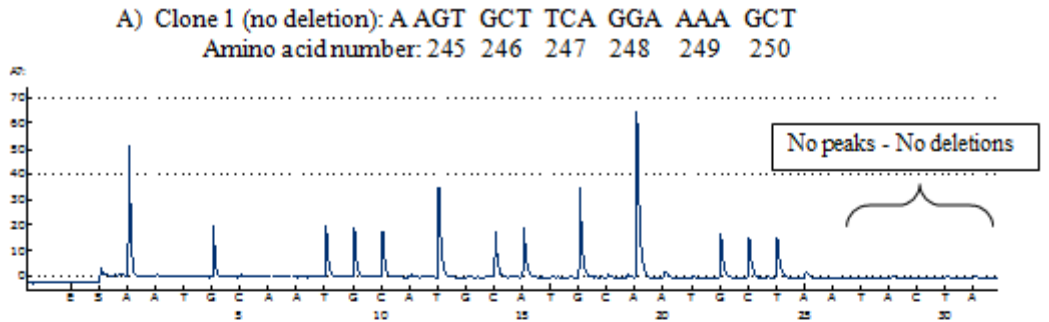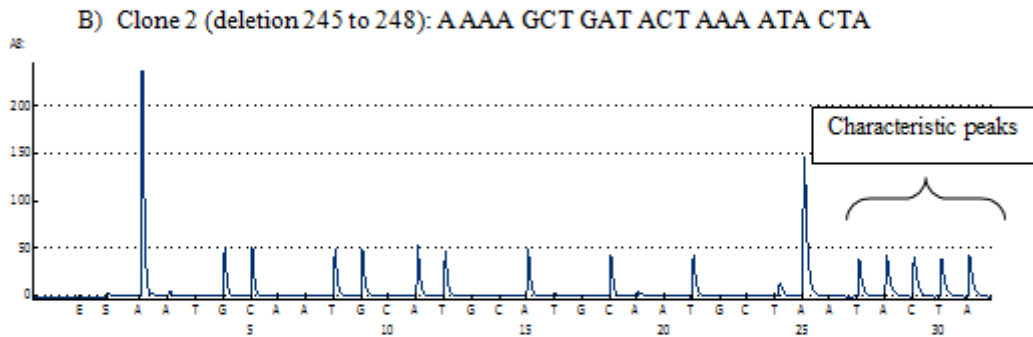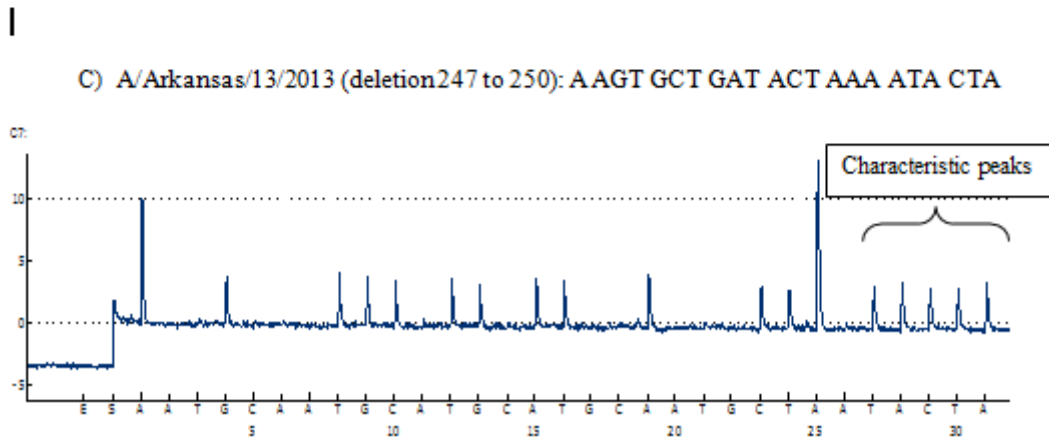

Supplement: AAC.04939-14_zac004153877so1.pdf [file AAC.04939-14_zac004153877so1.pdf]
